# Supplementary material for: External quality assessment providers’ services appear to more impact the immunohaematology performance of laboratories than national regulatory and economic conditions
Source: publisher site journal article supplement (doi:10.1515/cclm-2021-1219), 2022-01-18
Supplement: Supplementary file 1 [file j_cclm-2021-1219_suppl_002.docx]

**Supplement 2: EQA provider organisations, their characteristics and volume of data included**

| **EQA provider organisation** | **individual support for incorrect results** | **Number of samples** | **ABO**  **phenotyping** | **Rh (D) phenotyping** |
| --- | --- | --- | --- | --- |
| AAB-PT, American Association of Bioanalysts Proficiency Testing, USA | no | 90 | 16470 | 21392 |
| ANSM1, Agence nationale de sécurité du médicament et des produits de santé, France | no | 5 | 5745 | 5742 |
| Biologie Prospective, France | yes | 4 | 1788 | 1784 |
| Bio-Rad Laboratories (EQAS), USA | no | 27 | 4069 | 3927 |
| CALILAB, Asociatia Pentru Calitate in Laboratoare, Romania | no | 55 | 2488 | 2487 |
| CITM, Croatian Institute for Transfusion Medicine, Croatia | yes | 6 | 210 | 192 |
| CMC Vellore1, Christian Medical College Vellore, India | no | 10 | 108706 | 108641 |
| DPT, DMSc, MOPH1, Division of Proficiency Testing, Department of Medical Sciences, Ministry of Public Health, Thailand | yes | 9 | 64771 | 49693 |
| Equalis AB, Sweden | no | 63 | 2647 | 2662 |
| IQMH1, Institute for Quality Management in Healthcare, Canada | yes | 36 | 3185 | 3185 |
| ISPCH, Instituto de Salud Pública de Chile, Chile | no | 69 | 17538 | 17883 |
| KAEQAS1, Korean Association of External Quality Assessment Service, Korea | no | 36 | 22713 | 22335 |
| Labquality, Finland | no | 58 | 7979 | 10177 |
| Oneworld Accuracy, Canada | no | 16 | 4272 | 4246 |
| ÖQUASTA, Austrian Association for Quality Assurance and Standardization of Medical and Diagnostic Tests, Austria | no | 144 | 17466 | 17489 |
| PNCQ, Programa Nacional de Controle de Qualidade, Brazil | no | 12 | 10433 | 10437 |
| QualiCont In vitro Diagnostic Quality Control Nonprofit Ltd., Hungary | yes | 56 | 3329 | 3403 |
| RCPAQAP, The Royal College of Pathologists of Australasia, Quality Assurance Programs, Australia | yes | 48 | 2575 | 2633 |
| RfB, Referenzinstitut für Bioanalytik, Germany | no | 368 | 69666 | 69470 |
| RVZ SRK, Interregionale Blutspende SRK AG, Ringversuchszentrum, Switzerland | no | 31 | 5962 | 5962 |
| SANBS1, South African National Blood Service Proficiency Testing Programs, South Africa | no | 10 | 4324 | 4324 |
| Sciensano, Brussels, Belgium | yes | 82 | 15584 | 17028 |
| SEKK s.r.o., Czech Republic | no | 40 | 6308 | 9593 |
| SETS1, Sociedad Espanola de Transfusiòn Sanguínea y Terapia Celular, Spain | no | 14 | 10745 | 10745 |
| SKML, Dutch Foundation for Quality Assessment in Medical Laboratories, Netherlands | no | 126 | 12570 | 12914 |
| SOD Sicurezza e Qualità AOU Careggi, Italy | no | 44 | 524 | 535 |
| **total** |  | **1459** | **422067** | **418879** |

1 results of rounds as assessed by the EQA provider were reported, no detailed raw data
